# Supplementary material for: Identification and Quantitation of Bioactive and Taste-Related Dipeptides in Low-Salt Dry-Cured Ham
Source: MDPI journal article supplement (doi:10.3390/ijms23052507), 2022-02-24
Supplement: s1 [file s1]

Dipeptide PA

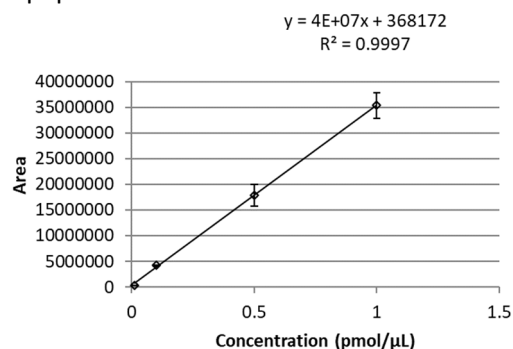

Dipeptide GA

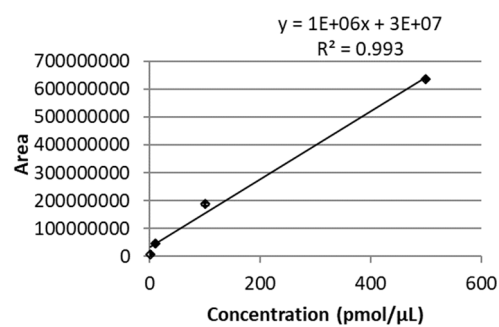

Dipeptide VG

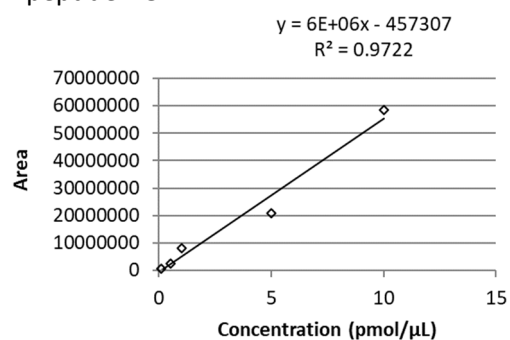

Dipeptide EE

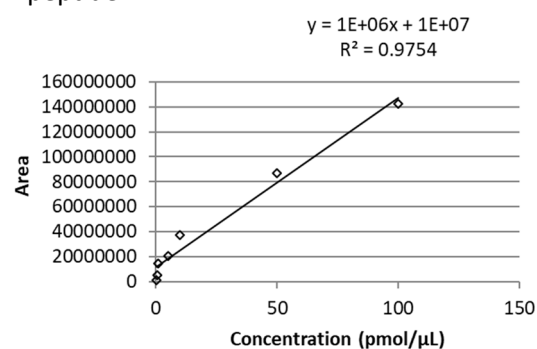

Dipeptide ES

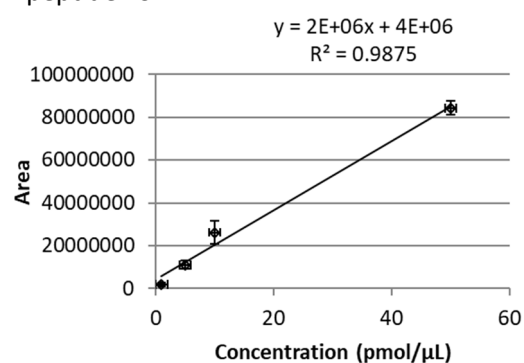

Dipeptide DA

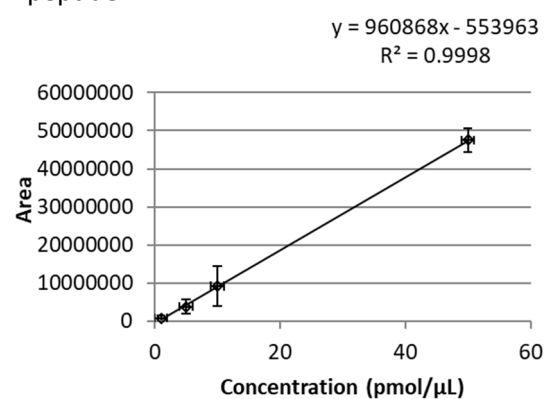

Dipeptide DG

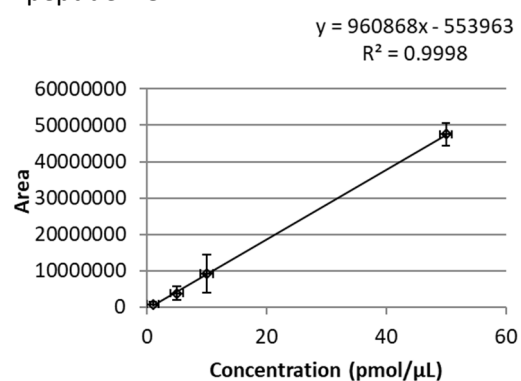

**Supplementary Figure S1.** Calibration curves and regression model used in the quantitation of the dipeptides.
